# Supplementary material
Source: MDPI journal article supplement (https://www.mdpi.com/1999-4907/9/5/244)
Supplement: s1 [file s1]

# Supplementary Material: Whitebark Pine in the Northern Cascades: Tracking the Effects of Blister Rust on Population Health in North Cascades National Park Service Complex and Mount Rainier National Park

Regina M. Rochefort, Shay Howlin, Lacey Jeroue, John Boetsch and Lise P. Grace

**Table S1.** Cumulative and progressive\* average percent of whitebark pine trees that were recorded as dead, live infected, and live uninfected by park and year.

| Park                                         | Year      | Cumulative    |                                     |                        | Progressive      |                           |                             |
|----------------------------------------------|-----------|---------------|-------------------------------------|------------------------|------------------|---------------------------|-----------------------------|
|                                              |           | % Dead        | % Live Infected (SE <sup>++</sup> ) | % Live Uninfected (SE) | % Dead Mean (SE) | % Live Infected Mean (SE) | % Live Uninfected Mean (SE) |
| Mount Rainier National Park                  | 2004      | 37.79 (11.28) | 18.48 (5.56)                        | 43.73 (6.85)           | 33.31 (12.14)    | 19.39 (5.77)              | 47.30 (3.92)                |
|                                              | 2009      | 41.68 (11.34) | 24.66 (7.53)                        | 33.66 (7.76)           | 14.31 (7.99)     | 41.36 (12.18)             | 44.33 (7.18)                |
|                                              | 2015      | 43.76 (11.45) | 38.27 (8.86)                        | 17.96 (6.39)           | 7.99 (3.68)      | 64.63 (12.25)             | 27.38 (9.01)                |
| North Cascades National Park Service Complex | 2004      | 6.74 (1.70)   | 32.33 (7.22)                        | 60.93 (19.38)          | 6.74 (1.70)      | 32.33 (7.22)              | 60.93 (19.38)               |
|                                              | 2009      | 19.89 (2.61)  | 40.48 (11.38)                       | 39.62 (14.72)          | 15.92 (1.79)     | 42.92 (11.99)             | 41.16 (15.26)               |
|                                              | 2015/2016 | 21.37 (2.20)  | 43.61 (11.37)                       | 35.02 (17.86)          | 8.43 (1.53)      | 51.39 (10.82)             | 40.17 (18.65)               |

\*In progressive calculations, previously dead trees were removed from 2009 and 2015/2016 event years. One site was dropped from Mount Rainier National Park progressive analysis because all trees in two of three sites were dead in 2004.

\*\* SE = standard error
